# Supplementary material
Source: ML conference proceedings conference paper supplement (https://proceedings.neurips.cc/paper_files/paper/2010/hash/db85e2590b6109813dafa101ceb2faeb-Abstract.html)
Supplement: Supplementary file 1 [file db85e2590b6109813dafa101ceb2faeb-Supplemental.zip]

## Appendix

### Scalability

In Figure 7-Left we plot run times for the experiments in Figures 3-5, where we can see that DC is approximately 2.5 times slower than standard LDA.

We also plot run times for DC with different number of topics (Figure 7-Center) and different number of documents (Figure 7-Right), and as can be seen it scales linearly with the number of topics and sublinearly with the number of documents.

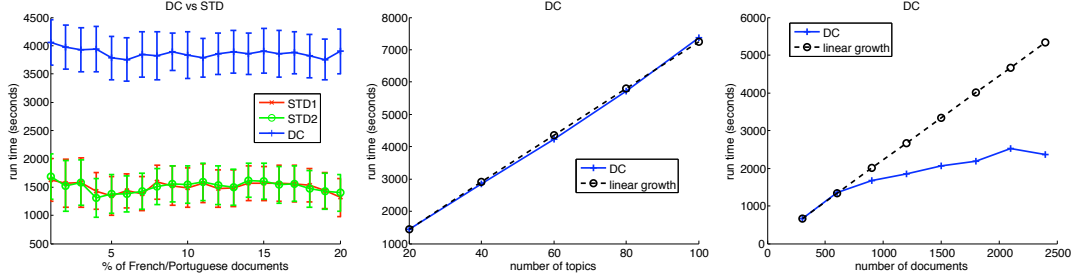

Figure 7: Left: run times for the experiments in Figures 3-5. Center: run times versus number of topics for downstream conditioning. Right: run times versus number of documents for downstream conditioning.

### Fast sampling

Following [19] we decompose eq. 6 in three terms:

$$p(z_{mn} = k | \text{rest}) \propto \underbrace{\beta_{kv} \frac{\alpha_k}{n_{k-}^K + \bar{\beta}_k}}_{:=A_k} + \underbrace{\beta_{kv} \frac{n_{km-}^{KM}}{n_{k-}^K + \bar{\beta}_k}}_{:=B_k} + \underbrace{\frac{n_{kvmn}^{KV} - [n_{km-}^{KM} + \alpha_k]}{n_{k-}^K + \bar{\beta}_k}}_{:=C_k}$$

Unlike in the generic case [4], some of the normalizations are now dependent on the *word* in question (via the  $\beta$  smoother). It is therefore not possible to apply the sampler of [19] directly, since all terms now depend on both the topics and the words via  $\beta_{kv}$ . We modify it as follows:  $A := \sum_k A_k$  only depends on  $w_{mn}$  in a *multiplicative* fashion via  $\beta_{kv}$  and it is constant throughout the document otherwise. In  $B := \sum_k B_k$  only two terms need updating whenever we reassign a word to a new topic (and we have a new multiplicative constant for different words via  $\beta_{kv}$ ). Hence, the only term that needs full recomputing for each word is  $C := \sum_k C_k$ . Fortunately, this is nonzero for only a small number of topics for a given word.
