# Supplementary material
Source: ML conference proceedings conference paper supplement (https://proceedings.neurips.cc/paper_files/paper/2010/hash/db85e2590b6109813dafa101ceb2faeb-Abstract.html)
Supplement: Supplementary file 2 [file db85e2590b6109813dafa101ceb2faeb-Supplemental.zip]

Archive with 1 entries (1 files):
- extra/NIPS2010_0566_extra.pdf
